# Supplementary material for: Healthcare costs of invasive meningococcal disease: a nationwide population-based study using an innovative clustering method to identify sequelae
Source: Research Square preprint supplement (doi:10.21203/rs.3.rs-6453754/v1), 2025-05-22
Supplement: Supplementary file 1 [file f43a64dc65ce3d5634036b82.docx]

**Additional Material**

**Additional file 1: Clustering developed for the study**

Given the complex nature of the data and the numerous sequelae of invasive meningococcal disease (IMD) that are difficult to exhaustively identify within claims databases and without clinical data, a clustering method approach was applied for exploring these intricate datasets.

This approach was employed to identify patients likely to exhibit IMD sequelae according to their healthcare journey. It was applied to individuals hospitalized for IMD who had at least one month of follow-up from the index date (excluding the index hospitalization).

1. **Population**

From the 4,502 exposed IMD-patients matched to their unexposed controls; 4,425 patients who had a hospital stay for IMD with a minimum follow-up of 1 month were selected for the clustering analysis.

1. **Variables selection method prior to clustering**

All the available variables were derived in categorical features (*except age: <1, [1-5[, [5-10[, [10-15[, [15-20[, [20-25[, [25-45[, [45-65[, 65+; gender [Male-Female] and universal coverage [Yes/No]*) according to their distribution over time (no or at least one consumption over 2 years).

In order to exploit the longitudinal nature of the data, the number of resource use was count over the two years post-index date and then aggregated in categorical data for limiting the impact of the very skewed distribution. Then, the fundamental principle of the method was to combine the benefits of Multiple Correspondence Analysis (MCA) with those of Fisher’s linear or quadratic discriminant analysis. This feature made the DISQUAL (Discriminant Score for Qualitative) method akin to PLS regression (which is based on a mixture of Principal Component Analysis and linear or logistic regression), thus enjoying the same advantageous properties: the ability to retain more explanatory variables in the model, appropriately distributed weights among these, and the elimination of the detrimental effects of multicollinearity.

*Variables retained for implementing the clustering method*

From the datasets, three sociodemographic variables and sixty-four healthcare consumptions metrics, as captured in the medico-administrative SNDS claims were selected for retention.

- Sociodemographic variables comprised age, gender, and universal insurance coverage (CMUc);
- HealthCare Resource Utilization (HCRU) variables were combined with sociodemographic factors to establish clusters. These HCRU variables included the previously delineated 64 variables, which were classified according to different types of healthcare services: medical and paramedical consultations, hospital stays, treatments and medical devices, medical and biological procedures, medical transport, daily allowances, and disability pensions.

The following table presents the variables and their respective importance criteria, as determined by the Multiple Correspondence Analysis (MCA)

| **Variables** | **Importance** |
| --- | --- |
| Psychologist visit | 0.0204 |
| Rehabilitation (SSR) stays associated with other reasons than IMD | 0.0151 |
| Medical devices (including implantables) | 0.0144 |
| Antineoplastics and immunomodulating agents | 0.0144 |
| Cardiovascular disease | 0.0142 |
| Cardiovascular system resource | 0.0138 |
| Vehicles for physically disabled | 0.0138 |
| Medicine surgery and obstetrics (MCO) Stays for orthopaedics surgery | 0.0132 |
| Orthotist-Prosthetist | 0.0131 |
| MCO stays for mental and behavioural disorders excluding addiction | 0.0128 |
| Amputation procedures | 0.0124 |
| Medical transports | 0.0116 |
| MCO stays for other reasons than IMD | 0.0111 |
| Pulmonologists visit | 0.0110 |
| Psychiatric stays associated with other reasons than IMD | 0.0110 |
| Psychiatric stays for mental and behavioural disorders excluding addiction | 0.0108 |
| Passage in MCO intensive care | 0.0106 |
| Audiologist | 0.0103 |
| SSR stays associated with neurological disorders | 0.0103 |
| Blood and hematopoietic organs conditions | 0.0103 |
| Psychiatric stays for infectious causes | 0.0102 |
| Ultrasound procedures | 0.0100 |
| Technical medical acts | 0.0098 |
| Physiotherapist | 0.0095 |
| MCO stays for infectious causes | 0.0090 |
| Anaesthesia and surgery acts | 0.0087 |
| Miscellaneous | 0.0086 |
| Psychiatric stays associated with neurological disorders | 0.0084 |
| SSR stays for infectious causes | 0.0084 |
| Disability pension | 0.0083 |
| Neurologists visit | 0.0078 |
| External orthoses and prostheses | 0.0078 |
| Medical imaging acts | 0.0078 |
| Medical devices for life support, food, and dressings | 0.0076 |
| GP's visits | 0.0076 |
| Optician | 0.0069 |
| Orthopaedic surgery visits | 0.0068 |
| Ophthalmologist visit | 0.0067 |
| Orthoptist | 0.0065 |
| Lab tests | 0.0064 |
| Digestive system and metabolism visits | 0.0059 |
| Other medical specialty visits | 0.0055 |
| Nurse | 0.0055 |
| Psychiatrist visits | 0.0053 |
| Plastic reconstructive surgery | 0.0052 |
| Dermatologist visits | 0.0051 |
| MCO stays for neurological disorders | 0.0050 |
| Paediatrician visits | 0.0048 |
| SSR stays for mental and behavioural disorders excluding addiction | 0.0043 |
| Systemic hormones, excluding sexual hormones and insulins dispensing | 0.0040 |
| Genito-urinary system and sexual hormones dispensing | 0.0040 |
| Nervous system drugs dispensing | 0.0038 |
| Obstetric procedures | 0.0035 |
| Speech therapist | 0.0030 |
| Musculoskeletal system drugs dispensing | 0.0029 |
| Otorhinolaryngologist visits | 0.0026 |
| Anti-infectives (systemic use) | 0.0024 |
| Sensory organs drugs dispensing | 0.0020 |
| Dental procedures | 0.0019 |
| Prophylaxis and prevention acts | 0.0018 |
| Daily allowances | 0.0015 |
| Respiratory system drugs dispensing | 0.0015 |
| Antiparasitic, insecticides, and repellents dispensing | 0.0009 |
| Other invasive medical devices (Title III) | 0.0004 |

1. **Clustering methodology**

Clustering algorithms are unsupervised machine learning techniques; given very little information about a dataset (namely, no a priori information such as training examples), they allow to extract hidden patterns in datasets by identifying groups of points that have higher pairwise similarity than with the rest of the dataset. Thus, designing efficient clustering methods has had major impact on a large number of communities over the last few decades. Due to the qualitative nature of some sociodemographic variables and the unique distribution (heterogeneity in care utilization frequencies and distributions of variables expressed in quantitative values) of HCRU variables; a K-modes clustering method was implemented after redefining continuous HCRU. This method aligned more closely with the data structure of the study. Many algorithms have been developed for clustering categorical data. In 1998, Huang et al. proposed the k-modes algorithm for categorical data clustering. This algorithm begins with k arbitrary “centres,” typically chosen uniformly at random from the data points (or from a more careful, computation intensive, distance sampling seeding). Each point is then assigned to its nearest centre in Hamming metric, and each centre is recomputed as the centre of mass of all points assigned to it (i.e., by taking the plurality on each coordinate of the points assigned to it; breaking ties uniformly at random). These last two steps are repeated until the process stabilizes. One can check that the k-median objective (i.e., sum of distances of each point to its closest centre) is monotonically decreasing, which ensures that no configuration is repeated during the course of the algorithm, and thus the procedure always terminates.

Assuming that clustering should result in at least one predominant patient group (likely without sequelae, between 70 and 80% according to the literature), and one or more minority subgroups with sequelae, we retained the outcome that resulted in two patient subgroups (those with IMD sequelae and those without).

Finally, the clustering model yield two clusters, those having high healthcare resource utilization (patients EIC+, 23% - 1,032 patients) and those with low healthcare resource utilization (77% - 3,393 patients).

1. **Clusters additional validation**
2. To better understand and validate these clusters, four subgroup analyses was conducted as sensitivity analyses. The examined subgroups consisted of:
   - a younger population (15-25 years old);
   - a population without comorbidities, considering that these two demographics are less affected by the correlations between age, healthcare utilization, and comorbidities.

Two additional subgroups were also studied:

- - a female population;
  - a young female population without comorbidities, as literature suggests that women may potentially experience more sequelae than men.

The identical K-modes clustering algorithm was employed within the four subgroup populations, and the frequencies of the EIC+ patient subgroup were subjected to comparative analysis against those of the EIC+ aggregate population through contingency analyses. This methodological approach ensures a robust statistical evaluation of the distribution patterns within the subgroups in relation to the overall population metrics.

1. To further our analysis, certain IMD sequelae diagnoses from algorithms derived from the literature were also sought among the different clusters. To be considered, at least one hospital diagnosis (MCO, SSR, RIM-P) or an active long-term disease (ALD) had to be present from the index date or during the two years following it.

| **Label** | **ICD-10 codes** | DRG | **Medical procedures** | **Source** |
| --- | --- | --- | --- | --- |
| Severe neurological disorders | *G08, G09, G12, G14, G21, G26, G31, G32, G36, G37, G43, G46, G50, G59, G61, G64, G70, G73, G80, G90, G92, G94, G95, R202, G571, R42, G91* |  |  | Weil-Olivier 2022 |
| Motor disorder | *G81, G82, G83* |  |  |  |
| Epilepsy | *G40, G41, R568* |  |  |  |
| Renal insufficiency | *N17, N18, N19, N25, Z49, I778* | *28Z01x* |  |  |
| Tubulointerstitial kidney disease | *N10, N11, N12, N13, N14, N15, N16* |  |  |  |
| Visual disorders | *H50, H350, H53, H54* |  |  |  |
| Deafness | *H90, H91, Z82.2, R48.8, S04.6, H93* |  | *CCGA001, CDGA001, CDLA002, CDMP002* |  |
| Mood disorders | *F3x* |  |  |  |
| Anxiety | *F41* |  |  |  |
| Intellectual disability | *F7x* |  |  |  |
| Behavioural disorders | *F6x, F9x* |  |  |  |
| Developmental disorders | *F8x* |  |  |  |
| Musculoskeletal disorders | *M13* |  |  |  |
| Vascular pathology | *I73, L95, I776, I870, I82* |  |  |  |
| Skin disorders | *L2, L3, L90, L91, R208* | *09C03, 09C09* | |  |
| Amputation |  | *08C06* |  |  |

*Results*

1. The implementation of the clustering algorithm on the four distinct subpopulations revealed that patients categorized within the EIC+ subgroups of these subpopulations were also consistently identified in over 90% of cases within the total analysis population. This significant overlap demonstrates the robustness of the clustering process across diverse patient cohorts.

Cf. the contingence table below.

**Contingence table**

|  | **Total** | **Young Population** | | **No comorbidities** | | **Female population** | | **Young female w/o comorbidities** | |
| --- | --- | --- | --- | --- | --- | --- | --- | --- | --- |
|  | *N (%)* | *N (%)* | *Likelihood to belonging the overall population* | *N (%)* | *Likelihood to belonging the overall population* | *N (%)* | *Likelihood to belonging the overall population* | *N (%)* | *Likelihood to belonging the overall population* |
| **EIC+**  **patients** | 1,032 (23%) | 206 (22%) | 97% | 597 (28%) | 90% | 522 (16%) | 96% | 91 (78%) | 95% |
| **Exposed individuals w/o care** | 3,393 (77%) | 713 (78%) | - | 1,553 (72%) | - | 2,736 (84%) | - | 316 (22%) | - |
| **Total clustering population** | 4,425 (100%) | 919 (100%) | 90% | 2,130 (100%) | 97% | 3,258 (100%) | 95% | 407 (100%) | 96% |

1. Sequelae identification in EIC+ and **Exposed individuals w/o care** patients (compared to their controls) using algorithms

Renal insufficiency, mood disorders, and severe neurological disorders were the predominant pathologies identified within the EIC+ cohort and had greater frequencies of these disorders in comparison to their matched controls.

The following table summarizes the frequency distribution of sequelae identified in both EIC+ and exposed individuals without care groups, put together with their respective controls.

|  | **Associated Controls to exposed individuals without care**  **(N= 10,012)** | **Exposed Individuals without Care (N=3,393)** | **Associated UIMC+ (N=3,216)** | **EIC+ Patients (N=1,032)** |
| --- | --- | --- | --- | --- |
|  | **%** | **%** | **%** | **%** |
| Developmental disorders | 0.59 | 0.97 | 0.25 | 1.16 |
| Musculoskeletal disorders | 0.05 | 0.12 | 0.03 | 1.16 |
| Amputations | 0.03 | 0.29 | 0.06 | 1.84 |
| Intellectual disability | 0.22 | 0.59 | 0.22 | 2.03 |
| Visual disorders | 0.1 | 0.38 | 0.37 | 2.13 |
| Behavioural disorders | 0.61 | 0.85 | 0.78 | 2.33 |
| Vascular disorders | 0.03 | 0.09 | 0.25 | 2.62 |
| Tubulointerstitial nephritis | 0.44 | 0.8 | 0.59 | 3.49 |
| Skin disorders | 0.31 | 0.83 | 0.9 | 5.04 |
| Deafness | 0.15 | 1.39 | 0.22 | 5.23 |
| Epilepsy | 0.45 | 1.95 | 0.78 | 5.91 |
| Anxiety | 0.58 | 0.56 | 1.00 | 5.91 |
| Severe neurological disorders | 0.36 | 1.71 | 1.06 | 9.11 |
| Motor disorders | 0.25 | 1.36 | 0.81 | 9.69 |
| Mood disorders | 0.97 | 1.15 | 2.3 | 10.27 |
| Renal insufficiency | 0.33 | 0.83 | 1.65 | 11.24 |
| All pathologies | 4.3 | 10.34 | 8.46 | 44.57 |

**Additional file 2: Comorbidities and Medical history**

*Translated from French using ChatGPT 4.0*

1. **Diabetes**

The algorithm for identifying type 1 or type 2 diabetes during the historical period is based on the presence of:

- A diabetes diagnosis date from a hospital stay in medical, surgical, or obstetrical department (MCO) or follow-up care unit (SSR) coded with ICD-10 codes E10 to E14 in principal diagnosis (DP), related diagnosis (DR), or associated diagnosis (DAS) and/or
- An active ALD for diabetes at the index date with International Classification of Diseases and related Health problems 10th revision (ICD-10) codes E10 to E14 and/or
- At least 2 dispensations of specific diabetes treatment (see table below):
- Oral antidiabetics (OADs) alone:
  - Insulin secretagogues (alone or in combination, i.e., sulfonylureas in dual or triple therapy)
  - Non-insulin secretagogues (i.e., metformin alone or in dual or triple therapy);
- OADs in combination with injectable antidiabetics:
  - OADs combined with insulin
  - OADs combined with non-insulin injectables (GLP-1)
  - OADs combined with insulin and non-insulin injectables (GLP-1);
- Injectable insulins:
  - Insulins in multiple injections
  - Predefined mixes;
- Insulin pumps.

The ATC codes for diabetes medications are: A10A (insulins), A10B (OADs).

Reimbursements for medical devices related to insulin therapy will also be considered.

| **CODE LPP** | **Name of the device related to insulinotherapy** | |
| --- | --- | --- |
| **1158476** | PERFUSION, INSULINE, YPSOMED, MYLIFE OMNIPOD, FORFAIT FORMATION TECH INITIALE | |
| **1115047** | PERFUSION, INSULINE, YPSOMED, MYLIFE OMNIPOD, FORFAIT JOURNALIER POD | |
| **1117201** | PERFUSION, INSULINE, YPSOMED, MYLIFE OMNIPOD, MISE A DISPO DU PDM ET PRESTATION | |
| **1120663** | PERFUSION, POMPE EXTERNE A INSULINE, CATHET ET CONSOM ASSOCIES, FORF JOURNALIER. | |
| **1188069** | PERFUSION, POMPE EXTERNE A INSULINE, FORFAIT MENSUEL | |
| **1131170** | PERFUSION, POMPE EXTERNE A INSULINE, LOCATION ET PRESTATION, FORFAIT JOURNALIER. | |
| **1130058** | PERFUSION, POMPE EXTERNE A INSULINE, PRESTATION JOURNALIERE | |
| **1186745** | PERFUSION, SYSTEME ACTIF AMBULATOIRE, ACHAT DE LA POMPE PROGRAMMABLE, INSULINE | |
| **1183333** | PERFUSION, SYSTEME ACTIF AMBULATOIRE, LOCATION POMPE PROGRAMMABLE, HORS INSULINE | |
| **1121332** | PERFUSION, SYSTEME ACTIF AMBULATOIRE, LOCATION POMPE PROGRAMMABLE, INSULINE | |
| **1110908** | PERFUSION, SYSTEME ACTIF, CATHETER ET CONSOMMABLES ASSOCIES POUR POMPE, INSULINE | |
| **1187472** | PERFUSION,SYSTEME ACTIF AMBULATOIRE,ACHAT DE LA POMPE PROGRAMMABLE HORS INSULINE | |
| **1199506** | PERFUSION,SYSTEME ACTIF,ACCESSOIRES USAGE UNIQUE POMPE AMBULATOIRE,HORS INSULINE | |
| **3455103** | POMPE IMPLANT, INSULINE EN INTRA-PERITONEALE, MEDTRONIC, MINIMED 2007D, CATHETER | |
| **3437157** | POMPE IMPLANT, INSULINE EN INTRA-PERITONEALE, MEDTRONIC, MINIMED 2007D, RENOUV | |
| **3429360** | POMPE IMPLANT, INSULINE EN INTRA-PERITONEALE, MEDTRONIC, MMT-2007D, PRIMO | |
| **3430511** | POMPE IMPLANT, INSULINE EN INTRA-PERITONEALE,MEDTRONIC,MINIMED 2007D, COMMUNICAT | |
| **1110624** | AUTOCONTROLE, APP. LECTURE AUTOM. GLYCEMIE/CETONEMIE, MENARINI, GLUCOFIX PREMIUM |
| **1186722** | AUTOCONTROLE DU SUCRE DANS LE SANG, 100 BANDELETTES, CAPTEURS OU ELECTRODES |
| **1186774** | AUTOCONTROLE, AUTOPIQUEURS A USAGE UNIQUE, STERILES, B/100 |
| **1187408** | AUTOCONTROLE DU SUCRE DANS LE SANG, 200 BANDELETTES, CAPTEURS OU ELECTRODES |
| **1117307** | AUTOCONTROLE DU SUCRE DANS LES URINES, BAYER, CLINITEST, TUBE DE 36 COMPRIMES |
| **1117454** | AUTOCONTROLE, AUTOPIQUEUR |
| **1122030** | AUTOCONTROLE, APP. LECT. AUTOM. GLYCEMIE/CETONEMIE, ABBOTT, FREESTYLE OPTIUM NEO |
| **1198033** | AUTOCONTROLE DU SUCRE DANS LE SANG, SET D'AUTOSURVEILLANCE DE LA GLYCEMIE |
| **1198145** | AUTOCONTROLE, 150 LANCETTES POUR AUTOPIQUEUR NON REUTILISABLES STERILES |
| **1199297** | AUTOCONTROLE, SET DE PRELEVEMENT DE SANG CAPILLAIRE. |
| **1128334** | AUTOCONTROLE, AUTOPIQUEURS A USAGE UNIQUE, STERILES, B/50 |
| **1136894** | AUTOCONTROLE DU SUCRE DANS LE SANG, 50 BANDELETTES, CAPTEURS OU ELECTRODES |
| **1138090** | AUTOCONTROLE, AUTOPIQUEURS A USAGE UNIQUE, STERILES, B/10 |
| **1141412** | AUTOCONTROLE, 50 LANCETTES POUR AUTOPIQUEUR NON REUTILISABLES STERILES |
| **1142883** | AUTOCONTROLE, AUTOPIQUEURS A USAGE UNIQUE, STERILES, B/200 |
| **1147308** | AUTOCONTROLE, AUTOPIQUEURS A USAGE UNIQUE, STERILES, B/150 |
| **1147863** | AUTOCONTROLE DU SUCRE DANS LES URINES, BAYER, CLINISTIX, ETUI CARTON 50 BAND. |
| **1154610** | AUTOCONTROLE, GLUCOSE/CORPS CETONIQUES,URINES, ROCHE, KETODIABUR, FLACON 50 BAND |
| **1157212** | AUTOCONTROLE, APP. LECTURE AUTOM. GLYCEMIE/CETONEMIE, ABBOTT, OPTIUM |
| **1163891** | AUTOCONTROLE, APP. LECTURE GLYCEMIE/CETONEMIE, ABBOTT, OPTIUM XCEED OU FREESTYLE |
| **1166100** | AUTOCONTROLE, 200 LANCETTES POUR AUTOPIQUEUR NON REUTILISABLES STERILES |
| **1167498** | AUTOCONTROLE DU SUCRE DANS LE SANG, 5 BANDELETTES, CAPTEURS OU ELECTRODES |
| **1172861** | AUTOCONTROLE DU SUCRE DANS LE SANG, ROCHE, CASSETTE ACCU-CHEK MOBILE, 100 |
| **1173487** | AUTOCONTROLE DU SUCRE DANS LE SANG, 10 BANDELETTES, CAPTEURS OU ELECTRODES |
| **1101720** | AUTOCONTROLE, APPAREIL POUR LECTURE AUTOMATIQUE CHIFFREE DE LA GLYCEMIE |
| **1101826** | AUTOCONTROLE, 100 LANCETTES POUR AUTOPIQUEUR NON REUTILISABLES STERILES |
| **1102257** | AUTOCONTROLE DU GLUCOSE INTERSTITIEL, 1 CAPTEUR, ABBOTT, FREESTYLE LIBRE. |
| **1103570** | AUTOCONTROLE DU GLUCOSE INTERSTITIEL, LECTEUR, ABBOTT, FREESTYLE LIBRE. |
| **1177611** | AUTOCONTROLE DE LA CETONEMIE, ABBOTT, FREESTYLE OPTIUM BETA CETONE B/10 |
| **1179337** | AUTOCONTROLE DE LA CETONEMIE, MENARINI, GLUCOFIX B-KETONE SENSOR B/2 Î 5 |
| **1180292** | AUTOCONTROLE DE L'ACETONE DANS LES URINES, BAYER, ACETEST, FLACON 100 COMPRIMES |
| **1180441** | AUTOCONTROLE DU SUCRE DANS LE SANG, 150 BANDELETTES, CAPTEURS OU ELECTRODES |
| **1180665** | AUTOCONTROLE, 10 LANCETTES POUR AUTOPIQUEUR NON REUTILISABLES STERILES |
| **1108350** | AUTOCONTROLE SUCRE DANS LE SANG, KIT AUTOSURV GLYCEMIE, ROCHE, ACCU-CHEK-MOBILE |
| **1182003** | AUTOCONTROLE DE LA CETONEMIE, ABBOTT, OPTIUM BETA CETONE |
| **1184309** | AUTOCONTROLE,GLUCOSE/CORPS CETONIQUES,URINES,ASCENSIA KETODIASTIX FLAC 50 BANDEL |

1. **Auto-immune disease**

Autoimmune diseases of interest include demyelinating diseases of the central nervous system (CNS) such as multiple sclerosis, skin conditions (lupus and psoriasis), rheumatoid arthritis, and chronic inflammatory bowel diseases.

These conditions were identified during the historical period by the presence of:

- An ALD30 ICD-10 code for 1 of these pathologies
- At least 1 hospitalisation with a primary or secondary diagnosis of one of these conditions
- At least 2 dispensations of a specific treatment.
- The ICD-10 codes used to identify these conditions are:
- **H46**: Optic neuritis
- **G040**: Acute disseminated encephalitis
- **G35**: Multiple sclerosis
- **G360**: Neuromyelitis optica
- **G368**: Other specified acute disseminated demyelinating diseases
- **L40**: Psoriasis
- **M09.0**: Juvenile arthritis in psoriasis
- **M07.3**: Other arthropathies in psoriasis
- **L93**: Lupus erythematosus
  - **L93.0**: Chronic lupus erythematosus
  - **L93.1**: Subacute cutaneous lupus erythematosus
  - **L93.2**: Other localized lupus erythematosus
- **M32: Systemic lupus erythematosus**
  - **M32.0**: Drug-induced systemic lupus erythematosus
  - **M32.1**: Systemic lupus erythematosus with organ or system involvement
  - **M32.8**: Other forms of systemic lupus erythematosus
  - **M32.9**: Systemic lupus erythematosus, unspecified
- **M05**: Rheumatoid arthritis with positive serology
- **M06**: Other rheumatoid arthritis
- **M08**: Juvenile arthritis
- **M09**: Juvenile arthritis not elsewhere classified
- **K50**: Crohn's disease
- **K51**: Ulcerative colitis
- **K52**: Other gastroenteritis and colitis
- Medications dispensed:
- **Multiple sclerosis (ATC class interferons)**: L03AB07, L03AB08, L03AX13
- **Psoriasis**: D05AX52 (Daivobet®)
- **Immunosuppressants and immunomodulators**:
  - Selective immunosuppressants: L04AA
  - Anti-TNF alpha agents: L04AB
  - Calcineurin inhibitors: L04AD
  - Thiopurines and others: L04AX
- **Aminoquinolines**: P01B
- **Specific antirheumatic agents**: M01C
- **Salicylate derivatives**: A07EC
- **Certain alkylating agents**: L01AA01 (cyclophosphamide)

1. **Tumour pathologies**

The algorithm for identifying tumour pathologies during the historical period is based on the presence of:

- A hospital stay in the PMSI MCO and SSR with a primary, related, or associated diagnosis code related to cancer: **C00-C99, D00-D48** and/or
- A hospital stay or session in the PMSI MCO and SSR with a primary diagnosis code related to chemotherapy or radiotherapy treatment: **Z51.1/Z51.2** and/or
- The initiation of an ALD related to cancer: **C00-C99, D00-D48**.

1. **Cardiovascular pathologies**

The algorithm for identifying cardiovascular pathologies during the historical period is based on the presence of:

- A hospital stay in the PMSI MCO and SSR with a primary or related diagnosis code related to a cardiovascular pathology, and/or
- The initiation of an ALD related to a cardiovascular pathology, and/or
- At least two dispensations of cardiovascular system medications.

The ICD-10 codes used were:

- **I10-I15**: Hypertensive diseases
- **I20-I25**: Ischemic heart diseases
- **I60-I69**: Cerebrovascular diseases
- **I70-I79**: Peripheral vascular diseases.

Medications were identified using ATC codes **C01 to C10**.

1. **Congenital Malformations**

The algorithm for identifying patients with congenital malformations throughout the follow-up period is based on the presence of:

- A hospital stay in the PMSI MCO with a primary, related, or associated diagnosis code for congenital malformations: **Q00 to Q99** and/or
- The initiation of an ALD related to a congenital malformation: **Q00 to Q99**.
